# Supplementary material for: Rational design and preparation of few-layered MoSe2 nanosheet@C/TiO2 nanobelt heterostructures with superior lithium storage performance
Source: Royal Society of Chemistry journal article supplement (doi:10.1039/c6ra01579d), 2016-01-01
Supplement: c6ra01579d1.pdf [file c6ra01579d1.pdf]

## Supporting information

### **Rational Design and Preparation of Few-layered MoSe<sub>2</sub> Nanosheets@C/TiO<sub>2</sub> Nanobelts Heterostructures with Superior Lithium Storage Performance**

Hanshuo Wu, Yuxin Wu, Xi Chen, Yongjin Ma, Mingquan Xu, Weifeng Wei, Jun Pan\*, Xiang Xiong\*

State Key Laboratory of Powder Metallurgy, Central South University, Changsha 410083, P. R. China,

E-mail: jun.pan@csu.edu.cn; xiongx@csu.edu.cn.

**Table S1** A table for list of electrochemical properties of MoSe<sub>2</sub> and its hybrid composites

| <b>Electrode description</b>                                      | <b>Initial discharge specific capacity</b>           | <b>Initial Coulombic efficiency</b> | <b>Cycling stability</b>                                                                            | <b>Rate performance</b>                                                                                        |
|-------------------------------------------------------------------|------------------------------------------------------|-------------------------------------|-----------------------------------------------------------------------------------------------------|----------------------------------------------------------------------------------------------------------------|
| This work                                                         | 1153.3 mAh g <sup>-1</sup> at 500 mA g <sup>-1</sup> | 74.4 %                              | 987.4 mAh g <sup>-1</sup> after 100 cycles at 500 mA g <sup>-1</sup>                                | 920, 906, 874, and 860 mAh g <sup>-1</sup> at 500, 1000, 2000, and 3000 mA g <sup>-1</sup>                     |
| Mesoporous MoSe <sub>2</sub> <sup>1</sup>                         | 759 mAh g <sup>-1</sup> at 21.1 mA g <sup>-1</sup>   | 79.2%                               | 630 mAh g <sup>-1</sup> after 35 cycles at 21.1 mA g <sup>-1</sup>                                  | 646, 604, 593, 557, 499, and 372 mAh g <sup>-1</sup> at 21.1, 42.2, 84.4, 211, 422, and 844 mA g <sup>-1</sup> |
| Nanocrystalline MoSe <sub>2</sub> <sup>2</sup>                    | 782 mAh g <sup>-1</sup> at 42.2 mA g <sup>-1</sup>   | 76.7%                               | 405 mAh g <sup>-1</sup> after 50 cycles at 42.2 mA g <sup>-1</sup>                                  | 600, 550, 450, 370, and 322 mAh g <sup>-1</sup> at 42.2, 84.4, 211, 422, and 4220 mA g <sup>-1</sup>           |
| MoSe <sub>2</sub> @porous hollow carbon spheres <sup>3</sup>      | 1321 mAh g <sup>-1</sup> at 200 mA g <sup>-1</sup>   | 57.4 %                              | 681 mAh g <sup>-1</sup> after 100 cycles at 200 mA g <sup>-1</sup>                                  | 820, 760, 680, and 640 mAh g <sup>-1</sup> at 500, 1000, 2000, 3000 mA g <sup>-1</sup>                         |
| Sheet-like MoSe <sub>2</sub> /C <sup>4</sup>                      | 821.7 mAh g <sup>-1</sup> at 100 mA g <sup>-1</sup>  | 72.3%                               | 576.7 mAh g <sup>-1</sup> after 50 cycles at 100 mA g <sup>-1</sup>                                 | 540 and 450 mAh g <sup>-1</sup> at 1000 and 2000 mA g <sup>-1</sup>                                            |
| MoSe <sub>2</sub> nanosheets/rGO <sup>5</sup>                     | 1060 mAh g <sup>-1</sup> at 500 mA g <sup>-1</sup>   | 67%                                 | 917 and 750 mAh g <sup>-1</sup> after 100 cycles at 500 and 1000 mA g <sup>-1</sup> , respectively. |                                                                                                                |
| Yolk-shell-structured MoSe <sub>2</sub> microspheres <sup>6</sup> | 527 mAh g <sup>-1</sup> at 200 mA g <sup>-1</sup>    | 85%                                 | 433 mAh g <sup>-1</sup> after 50 cycles at 200 mA g <sup>-1</sup>                                   | 442, 399, 382, 369, 364, and 345 mAh g <sup>-1</sup> at 100, 300, 500, 800, 1000 and 1500 mA g <sup>-1</sup>   |
| MoSe <sub>2</sub> nanoplates <sup>7</sup>                         | 513 mAh g <sup>-1</sup> at 42.2 mA g <sup>-1</sup>   | 85.7%                               | 369 mAh g <sup>-1</sup> after 50 cycles at 42.2 mA g <sup>-1</sup>                                  | 440 and 250 mAh g <sup>-1</sup> at 42.2 and 4228 mA g <sup>-1</sup>                                            |
| MoSe <sub>2</sub> /carbon fibre <sup>8</sup>                      | 887.9 mAh g <sup>-1</sup> at 200 mA g <sup>-1</sup>  |                                     | 390.7 mAh g <sup>-1</sup> after 100 cycles at 200 mA g <sup>-1</sup>                                | 462.1, 362.2, 294.2, 239.7 and 161.9 mAh g <sup>-1</sup> at 200, 500, 1000, 2000 and 5000 mA g <sup>-1</sup>   |
| S-doped MoSe <sub>2</sub> nanotubes <sup>9</sup>                  | 1316 mAh g <sup>-1</sup> at 100 mA g <sup>-1</sup>   |                                     | 947 mAh g <sup>-1</sup> after 30 cycles at 100 mA g <sup>-1</sup>                                   | 1054, 1020, 982, and 667 mAh g <sup>-1</sup> at 50, 100, 200 and 500 mA g <sup>-1</sup>                        |

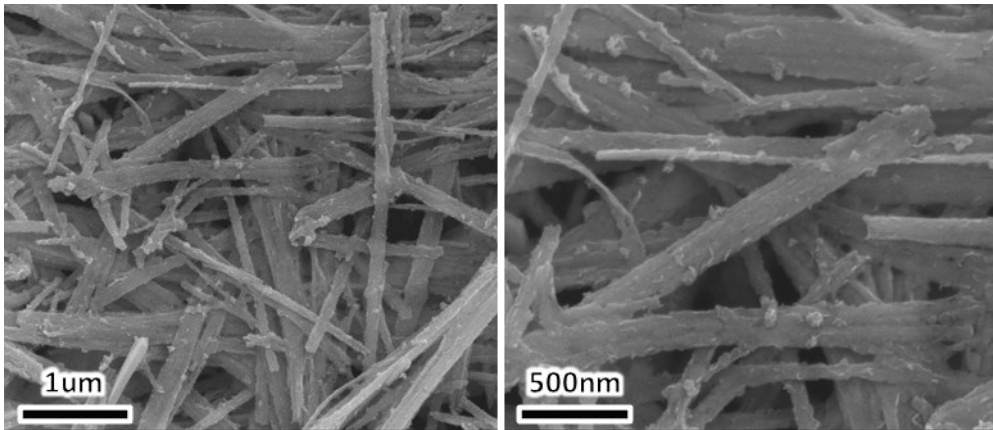

Fig.S1 SEM images of MoSe<sub>2</sub>/TiO<sub>2</sub> without the addition of glucose

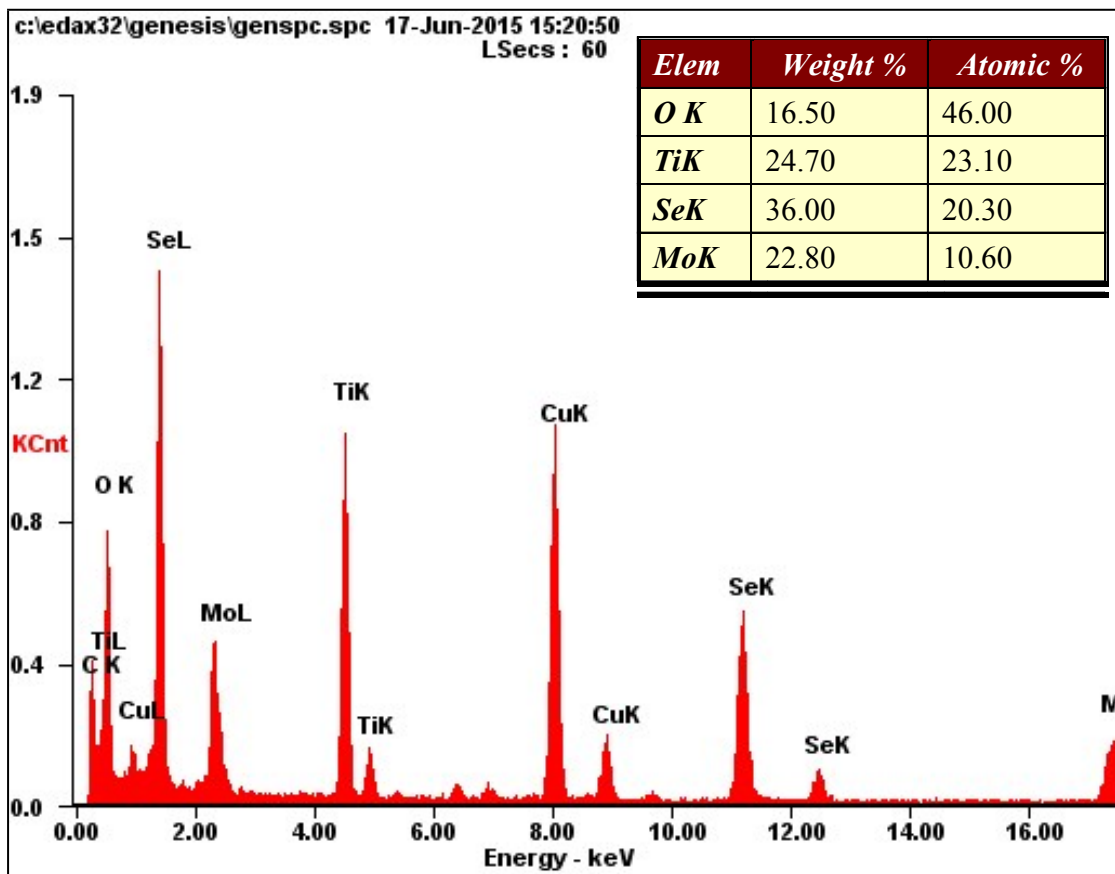

Fig.S2 EDX of MoSe<sub>2</sub>@C/TiO<sub>2</sub> heterostructures

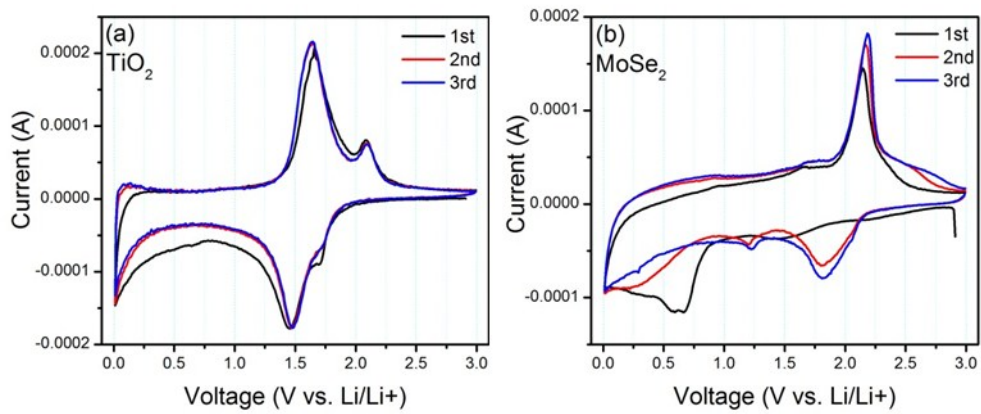

**Fig.S3** CV profiles of pure MoSe<sub>2</sub> nanosheets and bare TiO<sub>2</sub> nanobelts

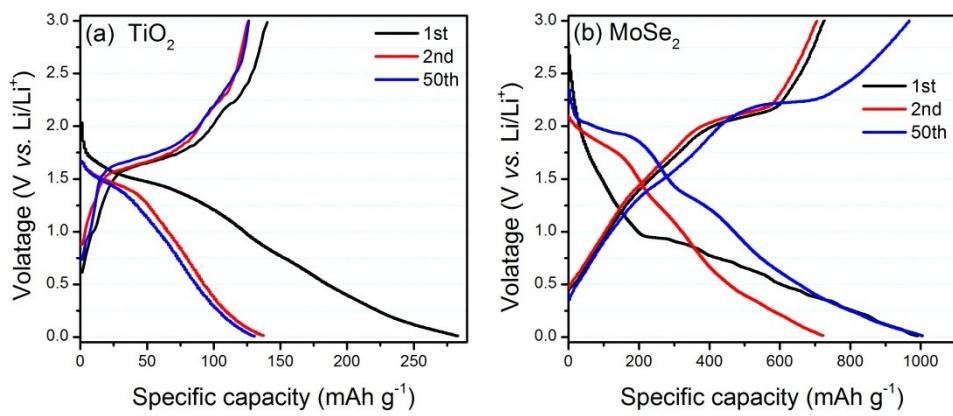

**Fig.S4** Discharge-charge voltage profiles of pure MoSe<sub>2</sub> nanosheets and bare TiO<sub>2</sub> nanobelts

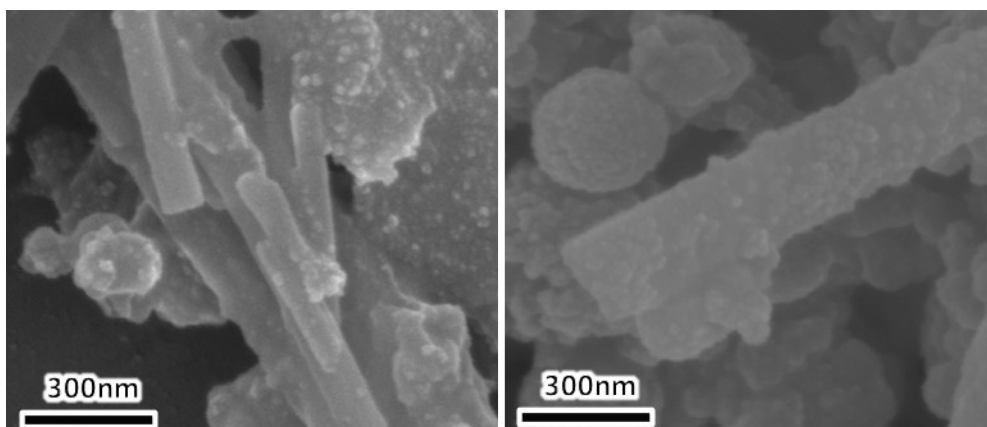

**Fig.S5** SEM images (Fig.S5) of MoSe<sub>2</sub>@C/TiO<sub>2</sub> heterostructures electrodes after cycling for 100 cycles

## References for Supporting Information

1. Y. Shi, C. Hua, B. Li, X. Fang, C. Yao, Y. Zhang, Y.-S. Hu, Z. Wang, L. Chen, D. Zhao and G. D. Stucky, *Advanced Functional Materials*, 2013, **23**, 1832-1838.
2. H. Wang, X. Wang, L. Wang, J. Wang, D. Jiang, G. Li, Y. Zhang, H. Zhong and Y. Jiang, *J. Phys. Chem. C*, 2015, **119**, 10197-10205.
3. X. Yang, Z. Zhang, Y. Fu and Q. Li, *Nanoscale*, 2015, **7**, 10198-10203.
4. Y. Liu, M. Zhu and D. Chen, *J. Mater. Chem. A*, 2015, **3**, 11857-11862.
5. Z. Zhang, Y. Fu, X. Yang, Y. Qu and Z. Zhang, *ChemNanoMat*, 2015, **1**, 409-414.
6. Y. N. Ko, S. H. Choi, S. B. Park and Y. C. Kang, *Nanoscale*, 2014, **6**, 10511-10515.
7. H. Wang, X. Lan, D. Jiang, Y. Zhang, H. Zhong, Z. Zhang and Y. Jiang, *J. Power Sources*, 2015, **283**, 187-194.
8. Y. Zhang, Z. Liu, H. Zhao and Y. Du, *RSC Advances*, 2016, **6**, 1440-1444.
9. Y. Yang, S. Wang, J. Zhang, H. Li, Z. Tang and X. Wang, *Inorganic Chemistry Frontiers*, 2015, **2**, 931-937.
